# Supplementary material for: Kinetics of large-scale chromosomal movement during asymmetric cell division in Escherichia coli
Source: PubMed Central journal article supplement (PMC5345879; doi:10.1371/journal.pgen.1006638), 2017-02-24

# Strain JM30

HupA-mCherry fluorescence

$I_{\text{peakRatio}} = (\text{Normalized Intensity}) / 100$

Frame time = 4 min

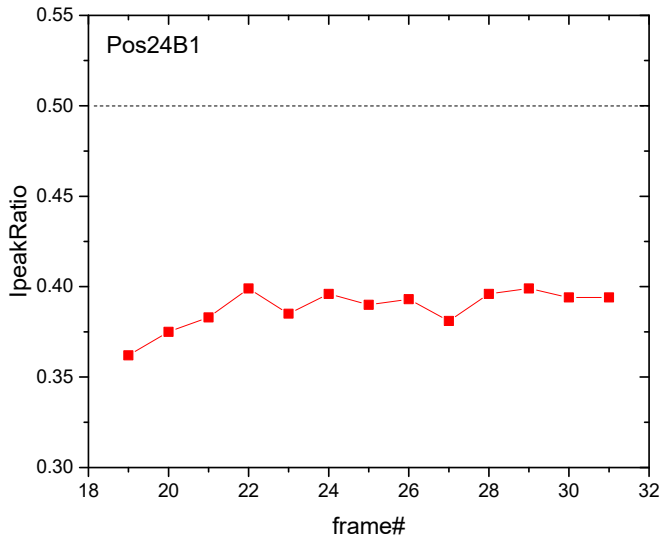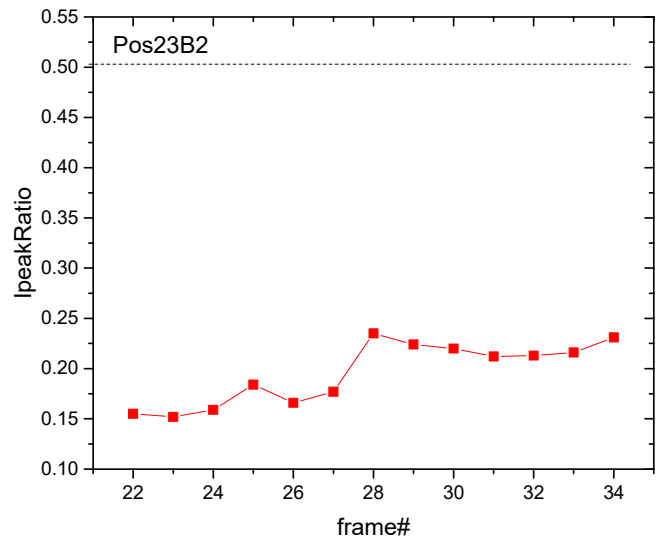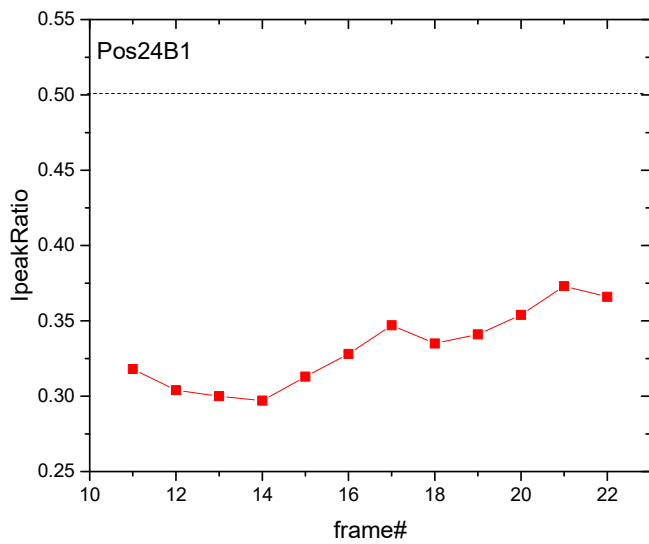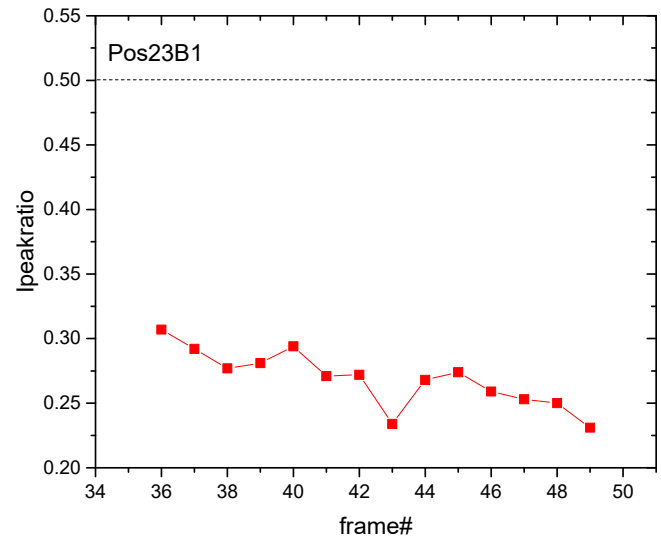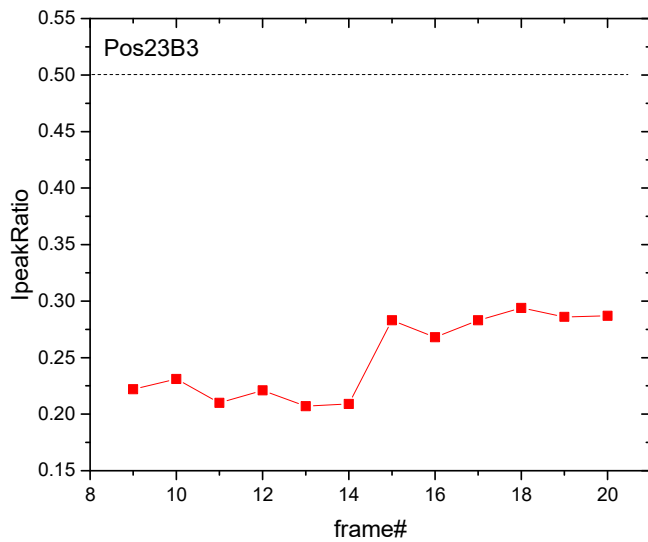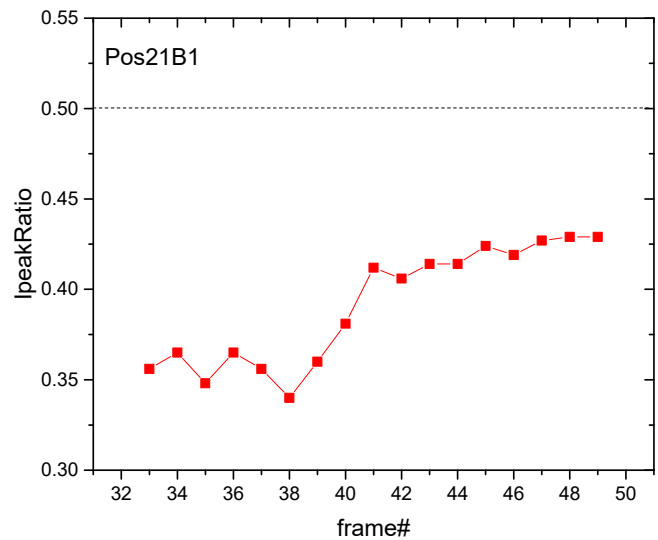

# Strain JM30

HupA-mCherry fluorescence

$I_{\text{peakRatio}} = (\text{Normalized Intensity}) / 100$

Frame time = 4 min

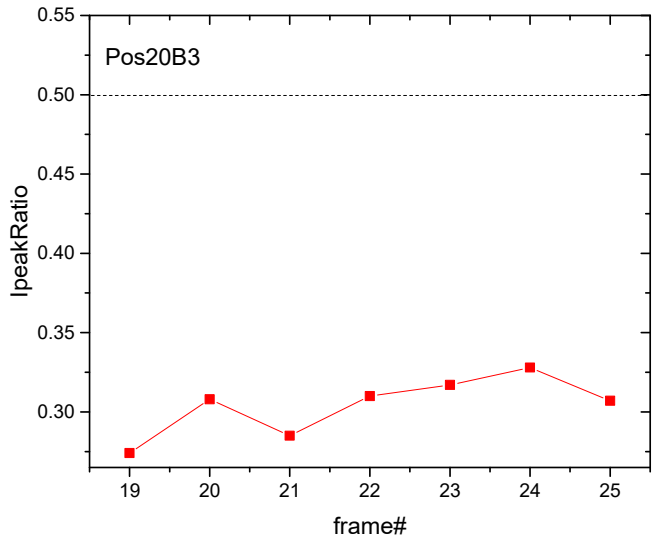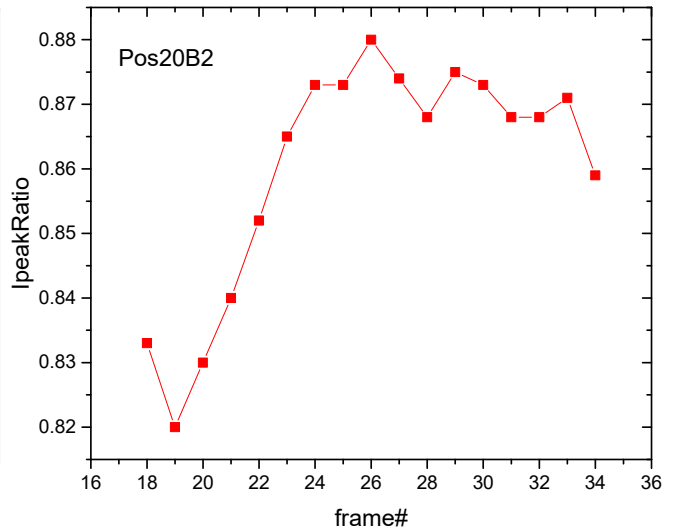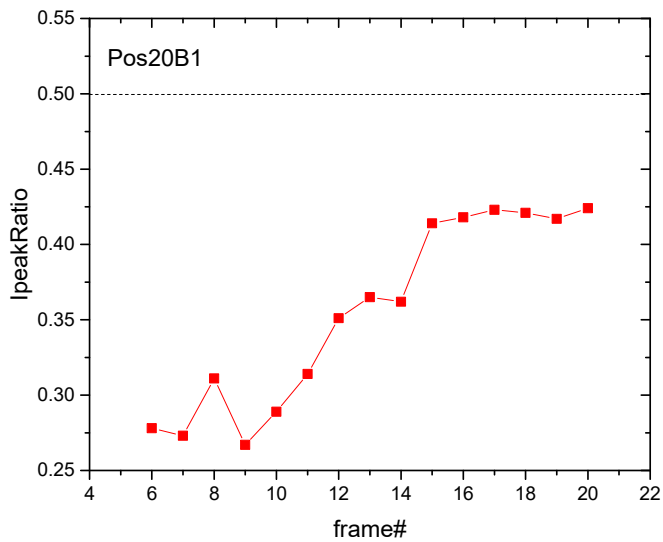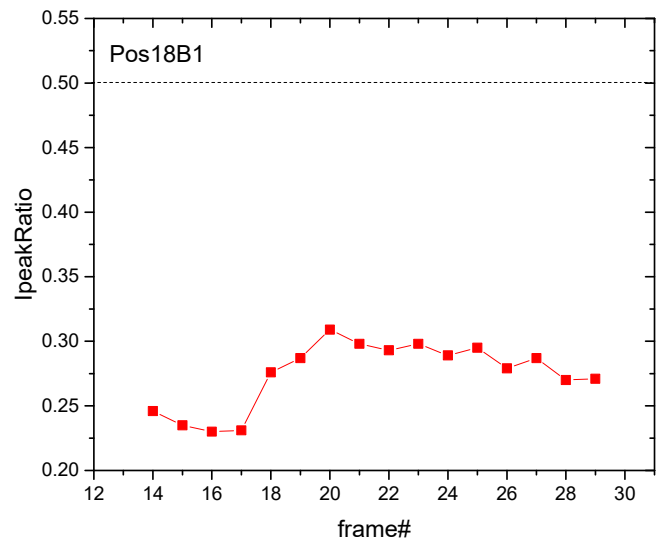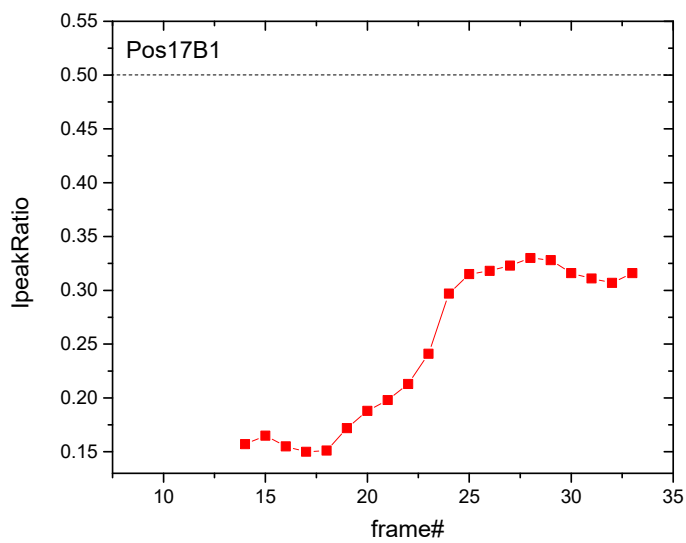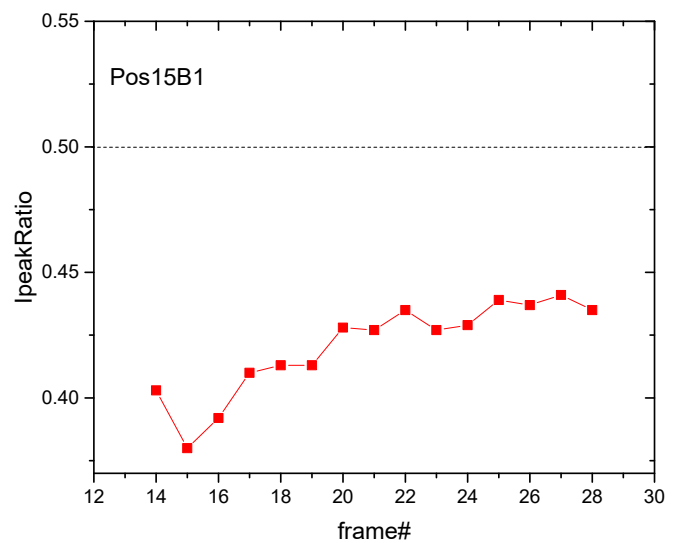

# Strain JM30

HupA-mCherry fluorescence

$I_{\text{peakRatio}} = (\text{Normalized Intensity}) / 100$

Frame time = 4 min

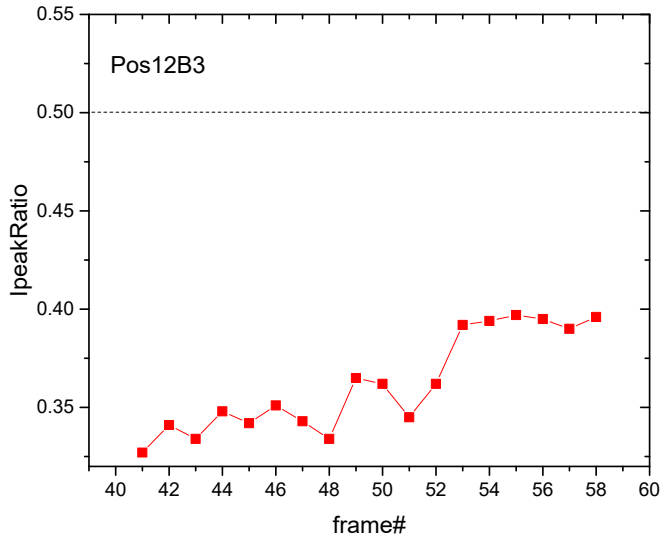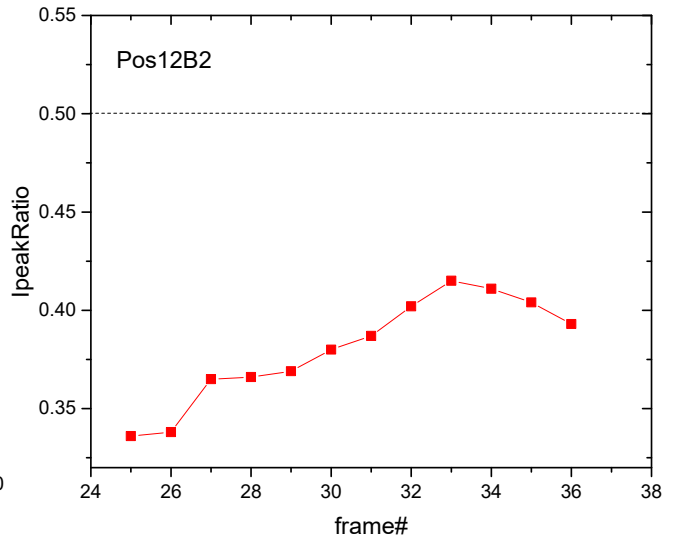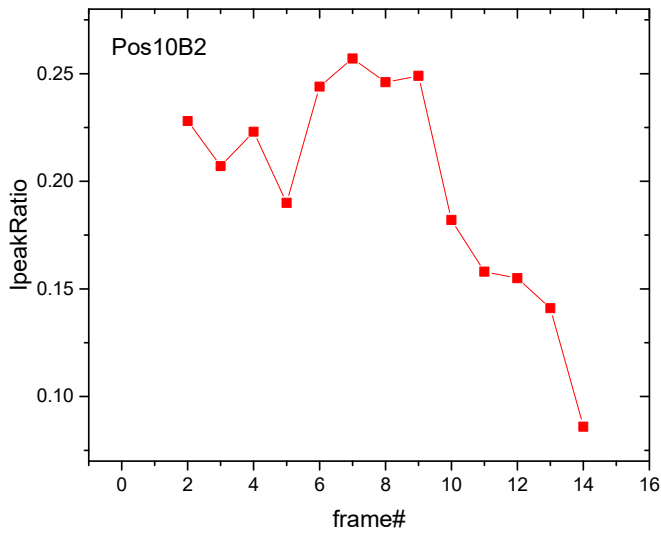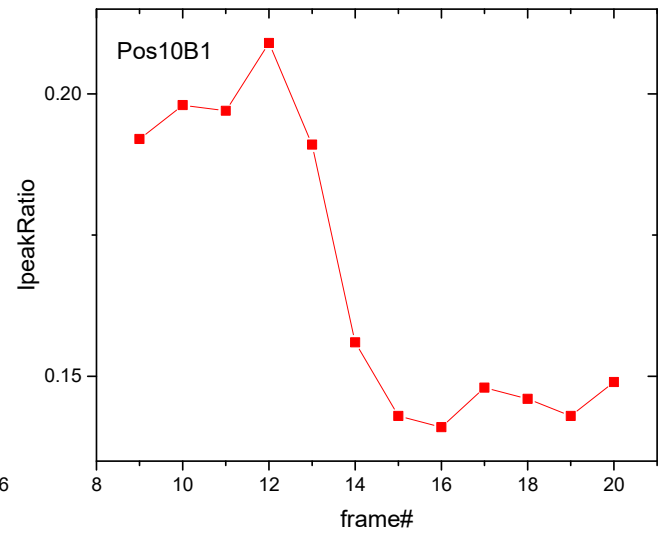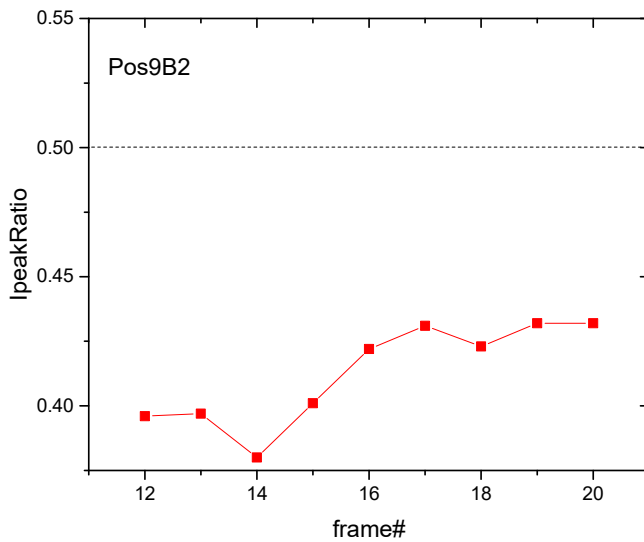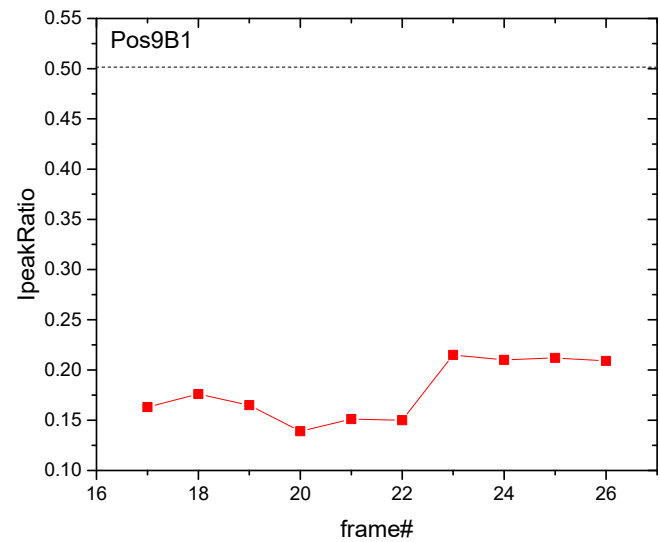

# Strain JM30

$$I_{\text{peakRatio}} = (\text{Normalized Intensity}) / 100$$

## HupA-mCherry fluorescence

Frame time = 4 min

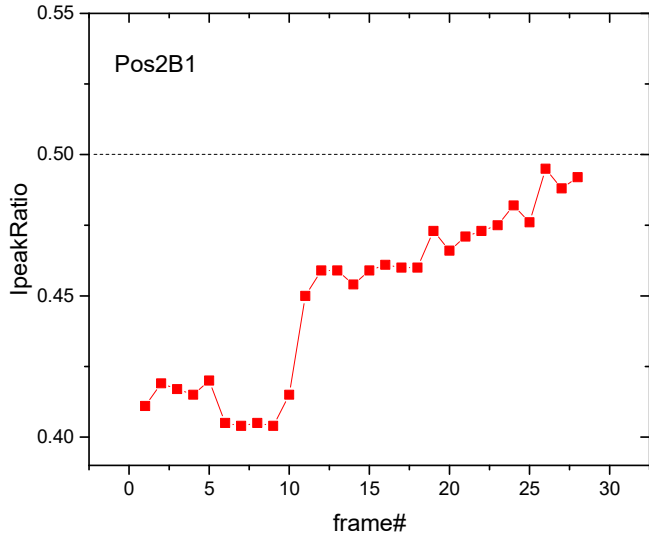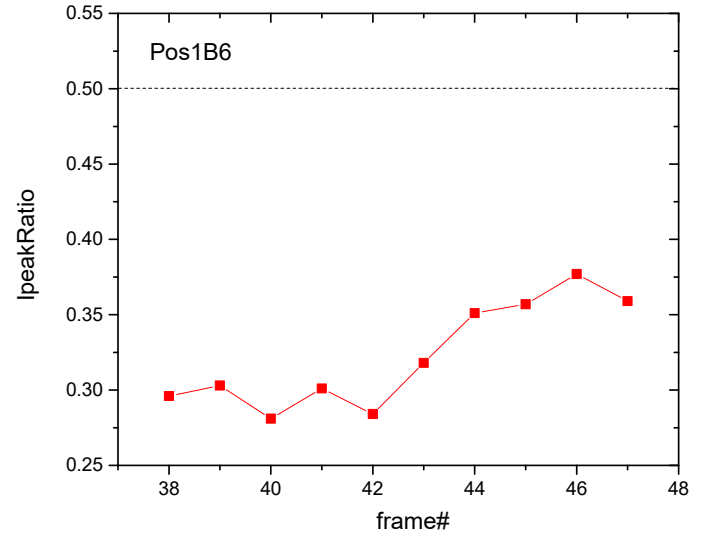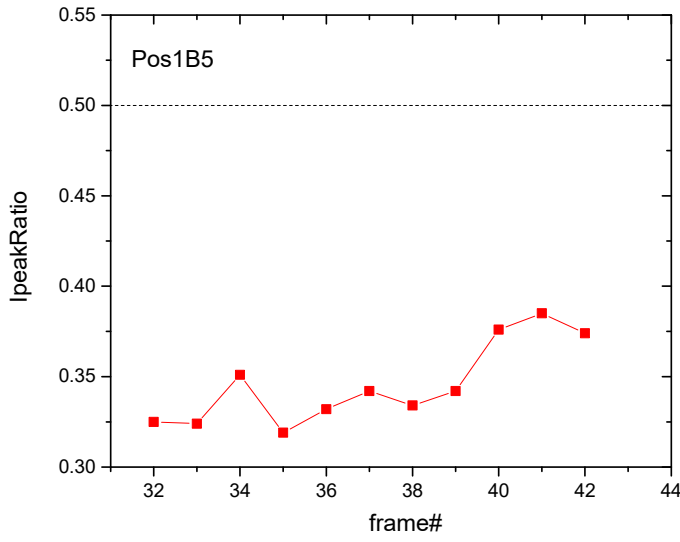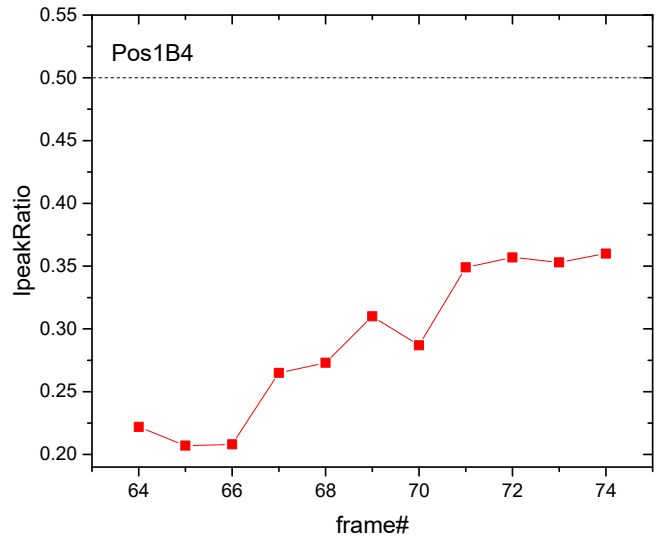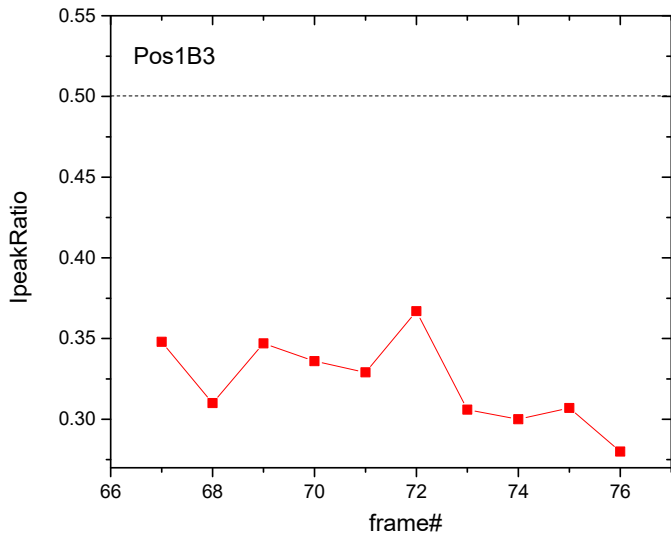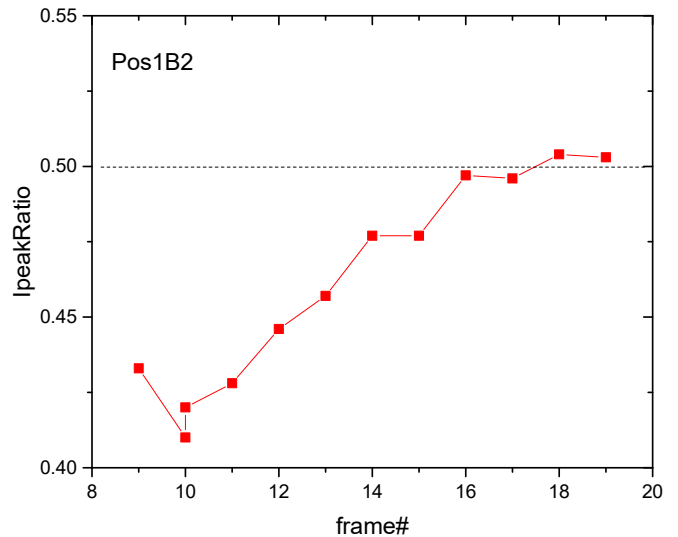

# Strain JM30

$I_{\text{peakRatio}} = (\text{Normalized Intensity}) / 100$

HupA-mCherry fluorescence

Frame time = 4 min

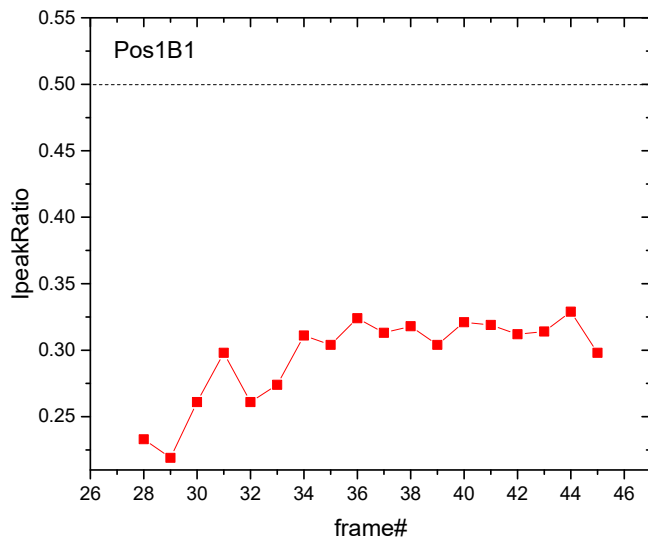

Supplement: pgen.1006638.s013.pdf [file pgen.1006638.s013.pdf]
