# Supplementary material for: Kinetics of large-scale chromosomal movement during asymmetric cell division in Escherichia coli
Source: PubMed Central journal article supplement (PMC5345879; doi:10.1371/journal.pgen.1006638), 2017-02-24

# Strain JM30

HupA-mCherry and SYTOX Green fluorescence

$$\text{IpeakRatio} = (\text{Normalized Intensity}) / 100$$

Frame time = 4 min

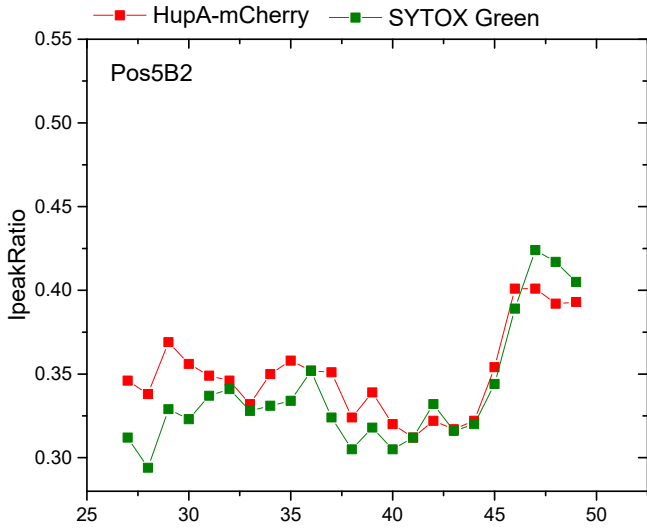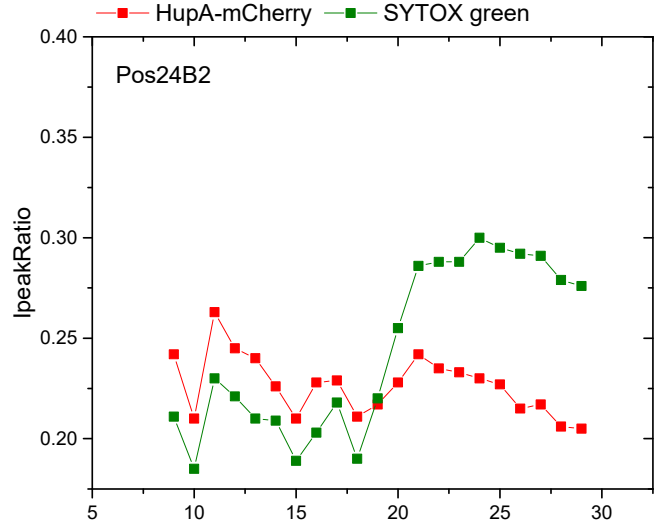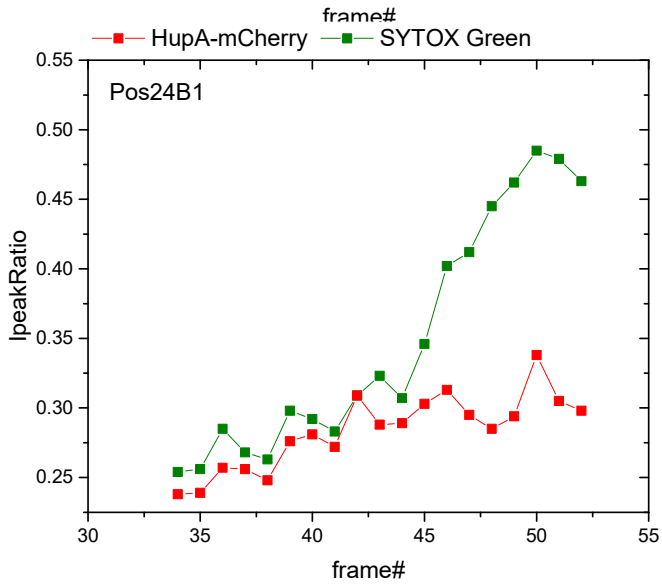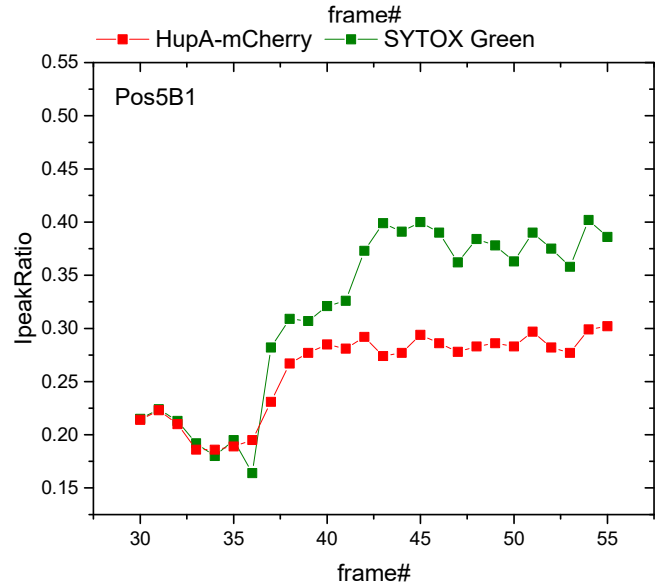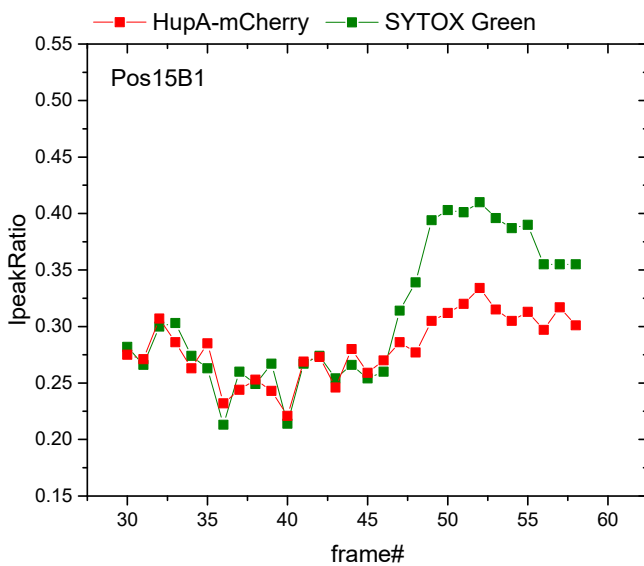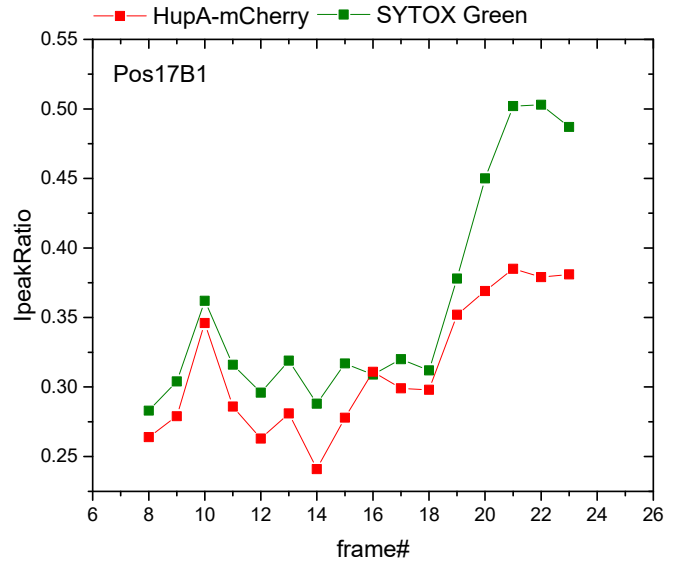

# Strain JM30

HupA-mCherry and SYTOX Green fluorescence

$$\text{IpeakRatio} = (\text{Normalized Intensity}) / 100$$

Frame time = 4 min

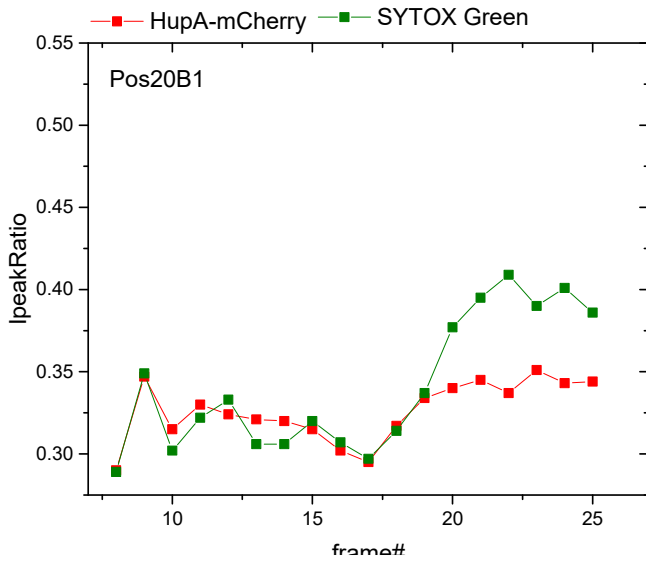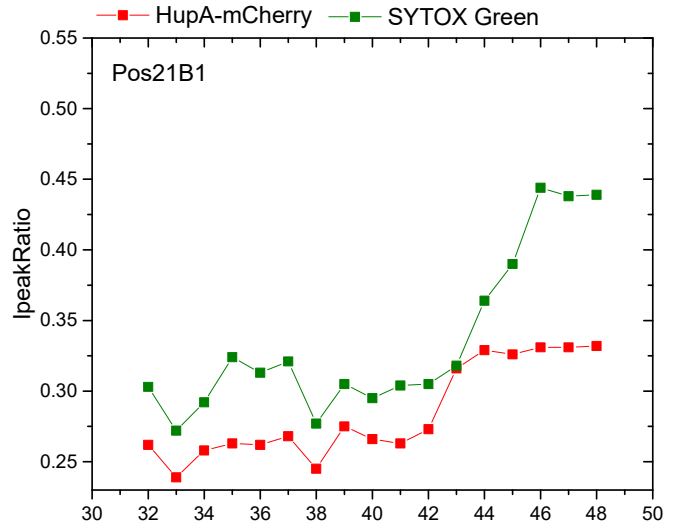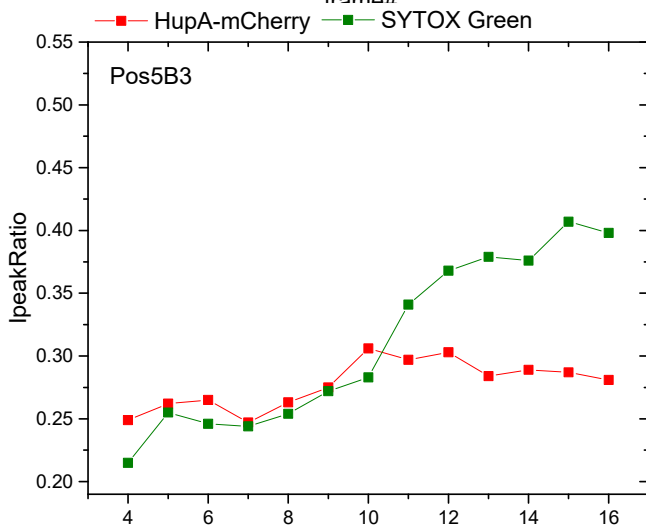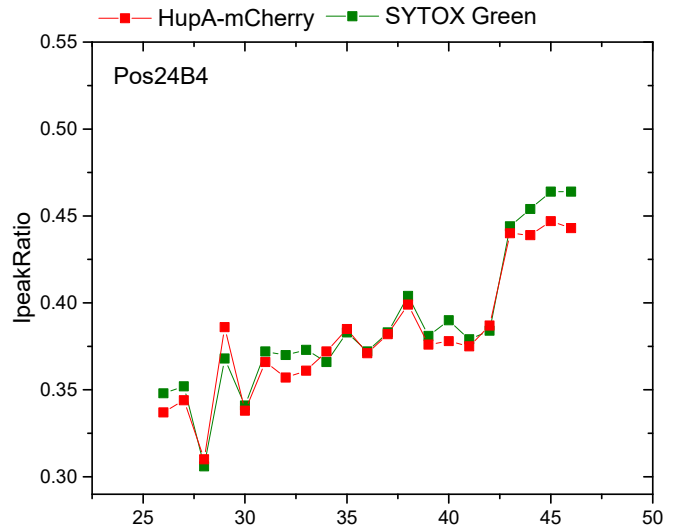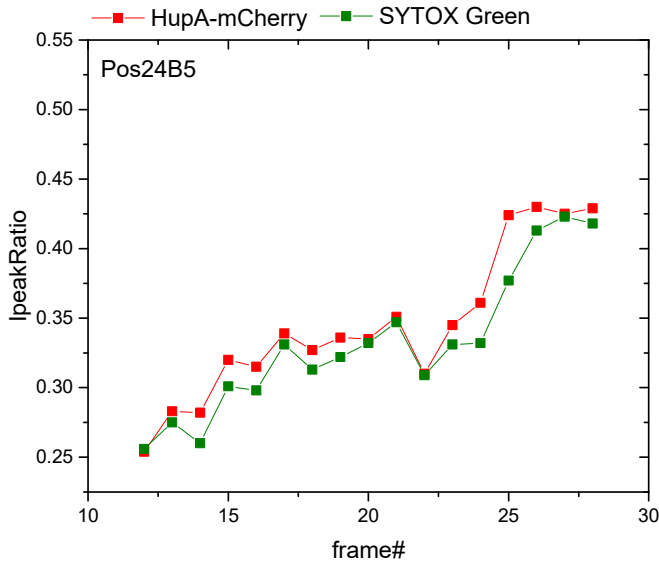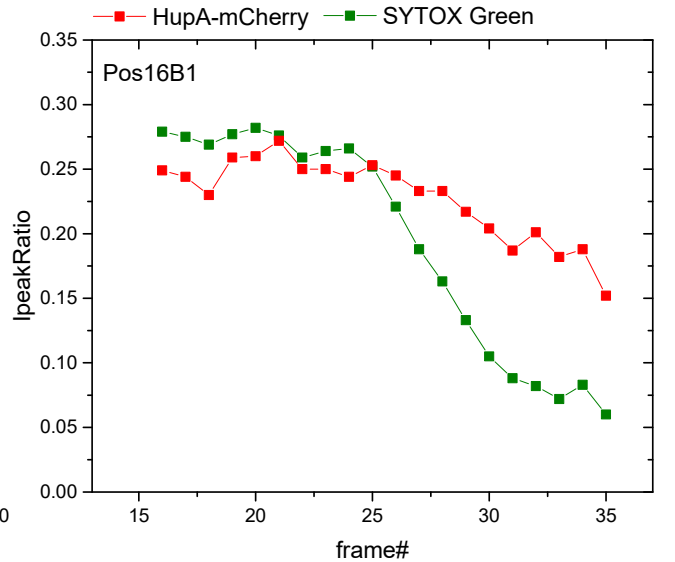

# Strain JM30

## HupA-mCherry and SYTOX Green fluorescence

$$\text{IpeakRatio} = (\text{Normalized Intensity}) / 100$$

Frame time = 4 min

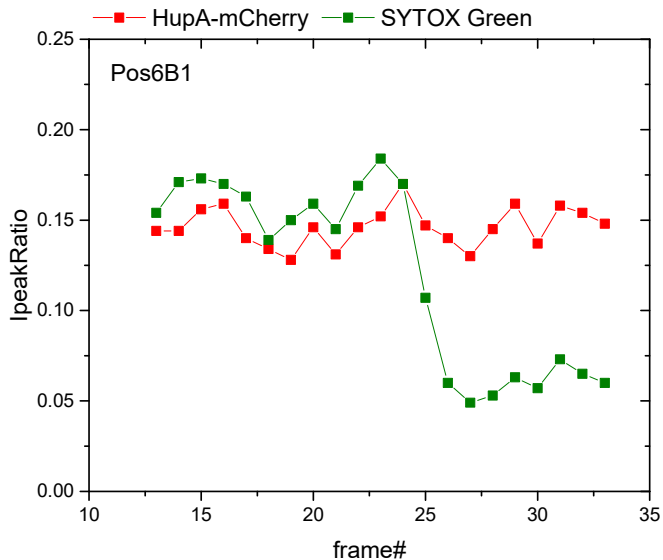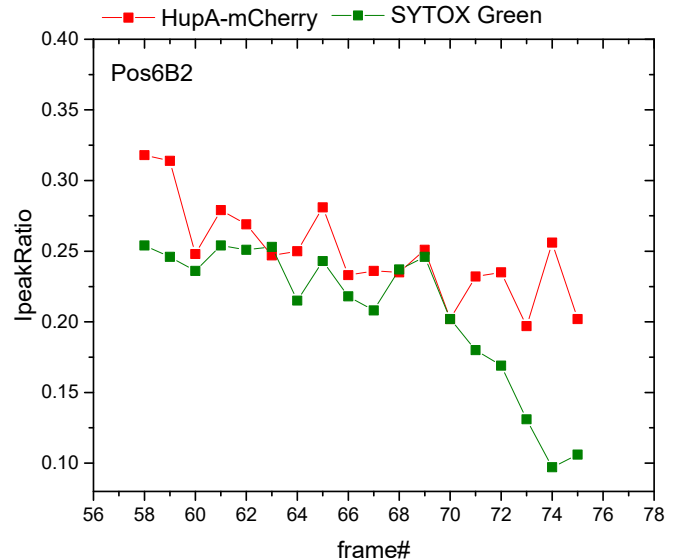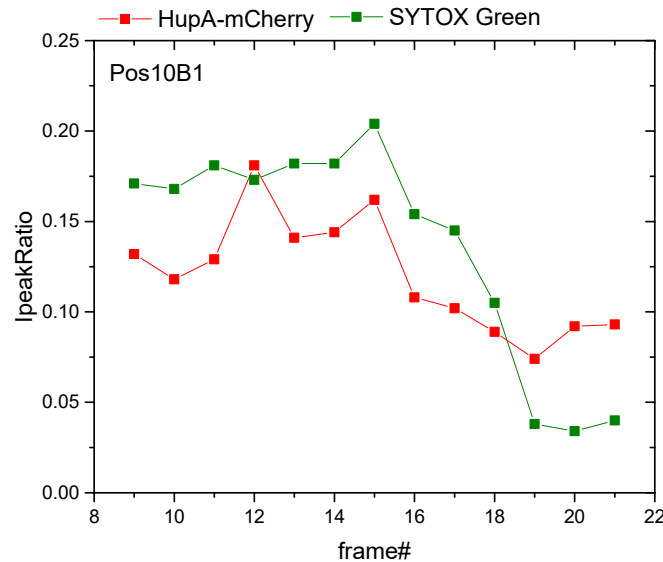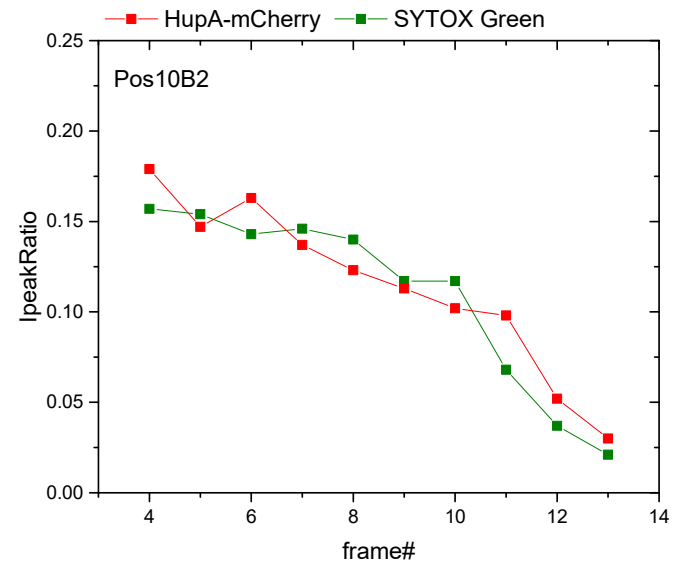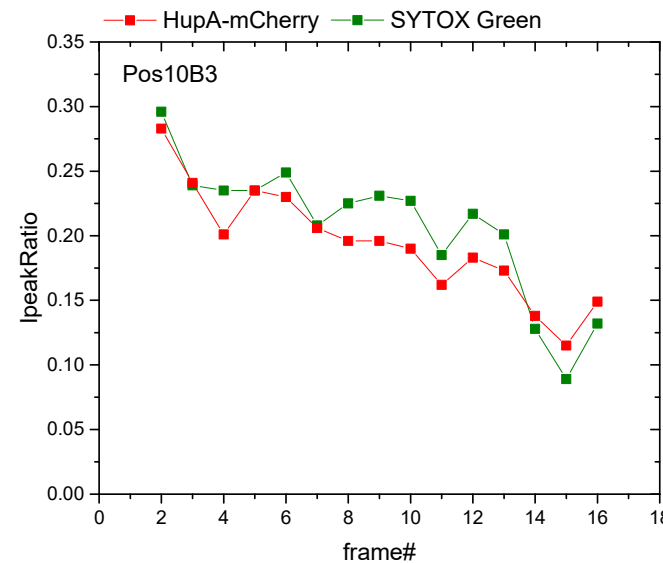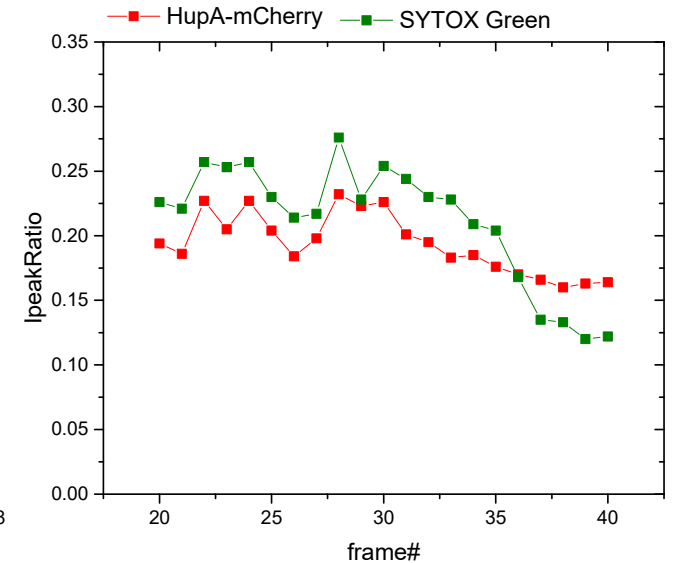

# Strain JM30

HupA-mCherry and SYTOX Green  
fluorescence

$$I_{\text{peakRatio}} = (\text{Normalized Intensity}) / 100$$

Frame time = 4 min

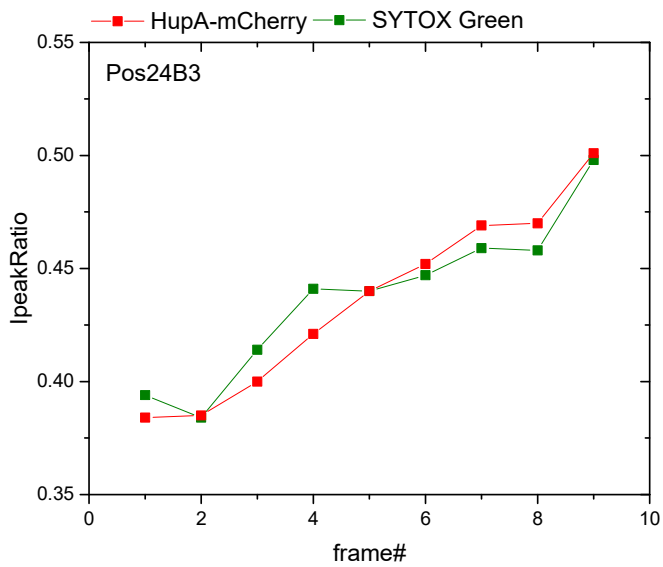

Supplement: pgen.1006638.s014.pdf [file pgen.1006638.s014.pdf]
