# Supplementary material for: Kinetics of large-scale chromosomal movement during asymmetric cell division in Escherichia coli
Source: PubMed Central journal article supplement (PMC5345879; doi:10.1371/journal.pgen.1006638), 2017-02-24

# Strain MB16

## HupA-mCherry and DAPI fluorescence; ZipA-GFP induced

$I_{\text{peakRatio}} = (\text{Normalized Intensity}) / 100$   
0 min. corresponds to time when ZipA-GFP label dissociates from the septum

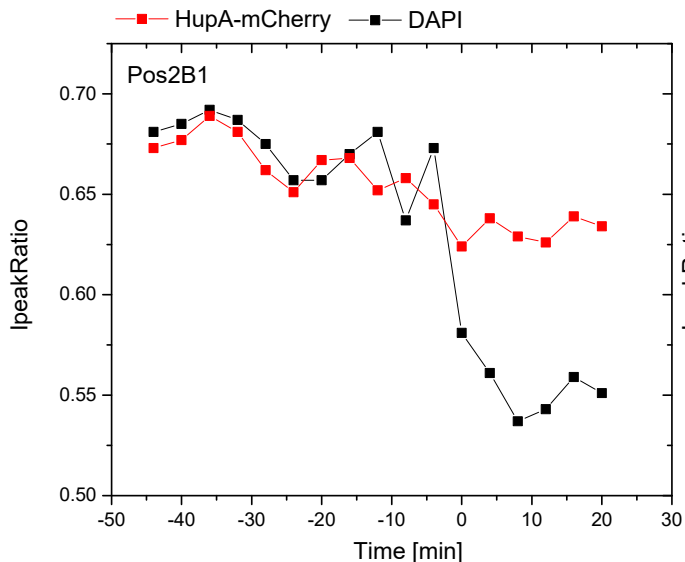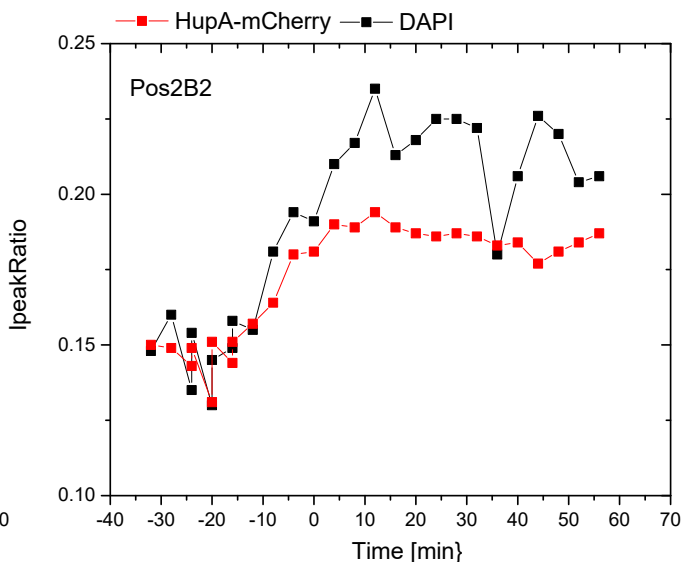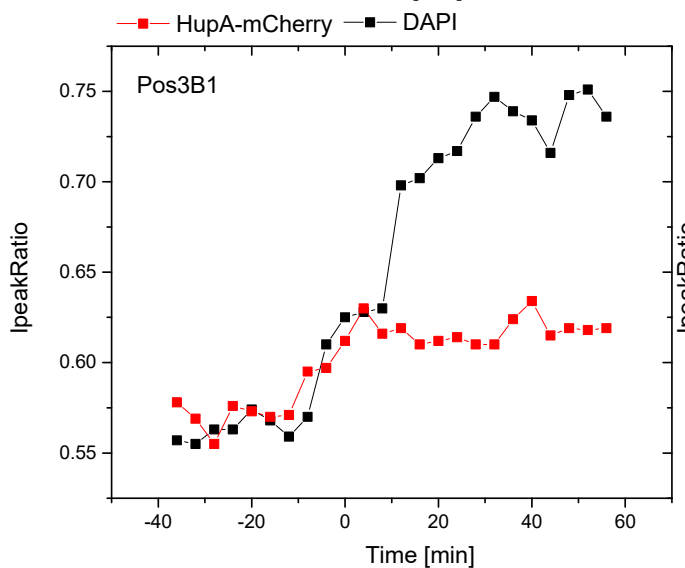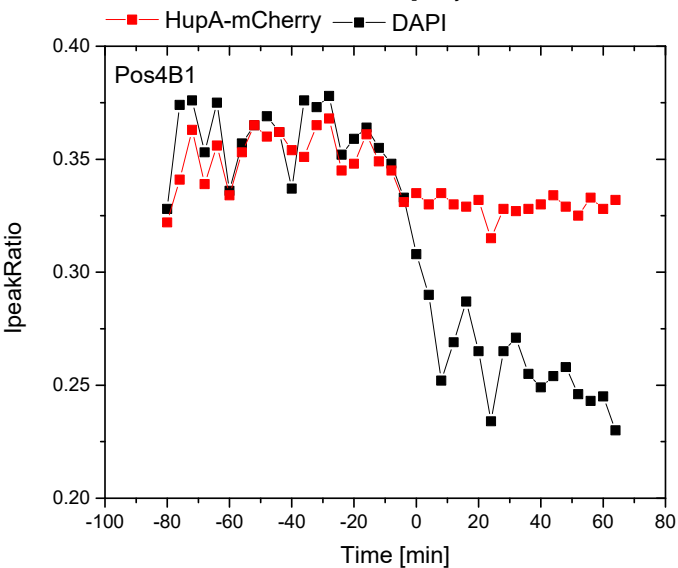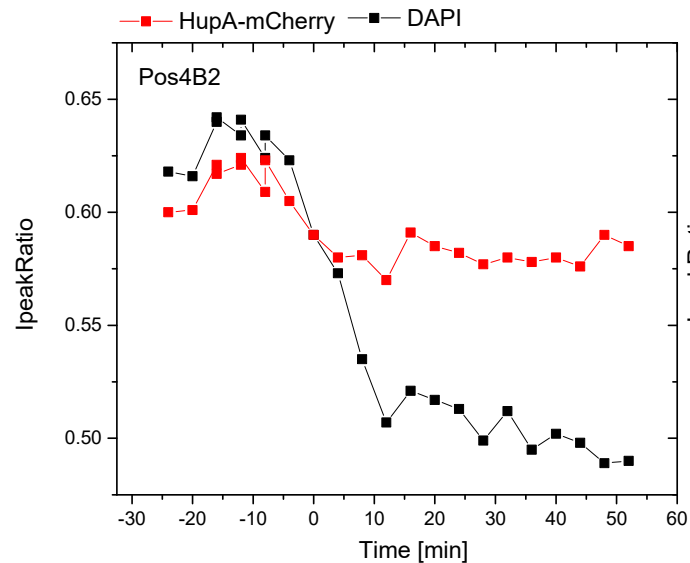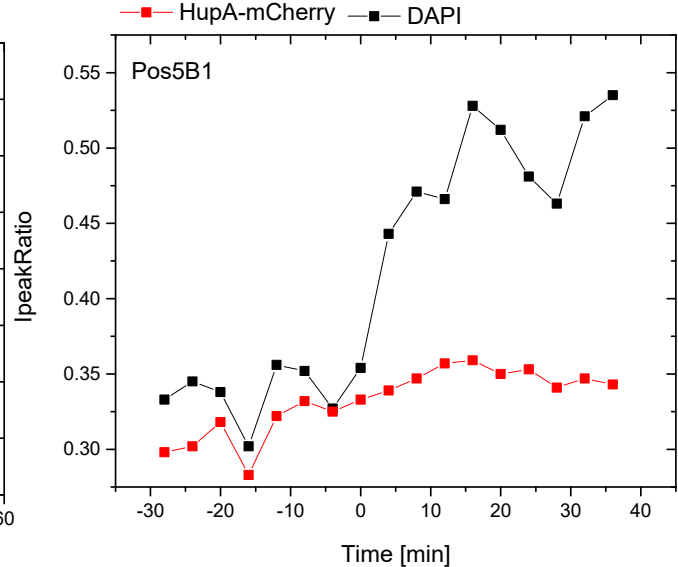

# Strain MB16

HupA-mCherry and DAPI  
fluorescence; ZipA-GFP induced

$I_{\text{peakRatio}} = (\text{Normalized Intensity}) / 100$   
0 min. corresponds to time when ZipA-GFP  
label dissociates from the septum

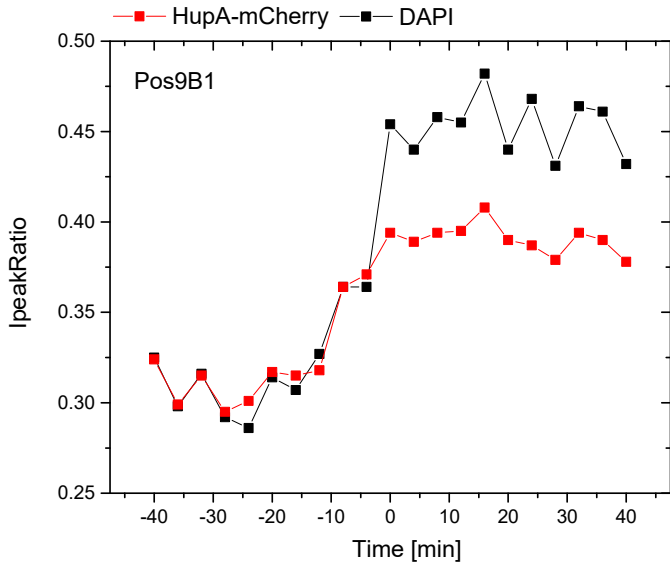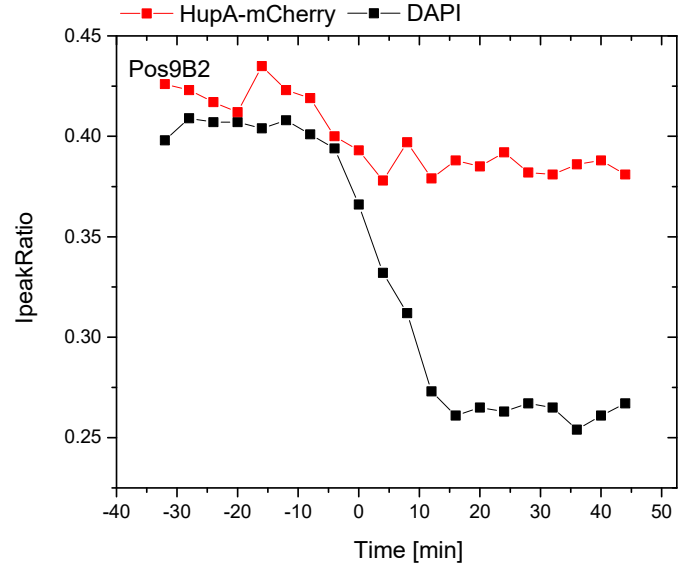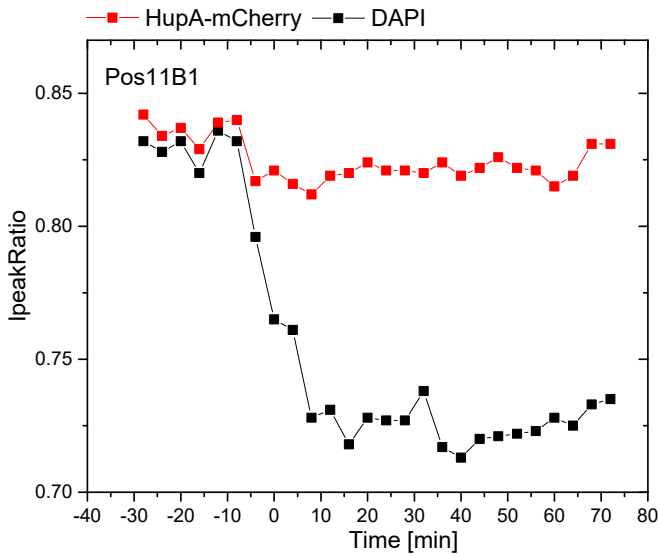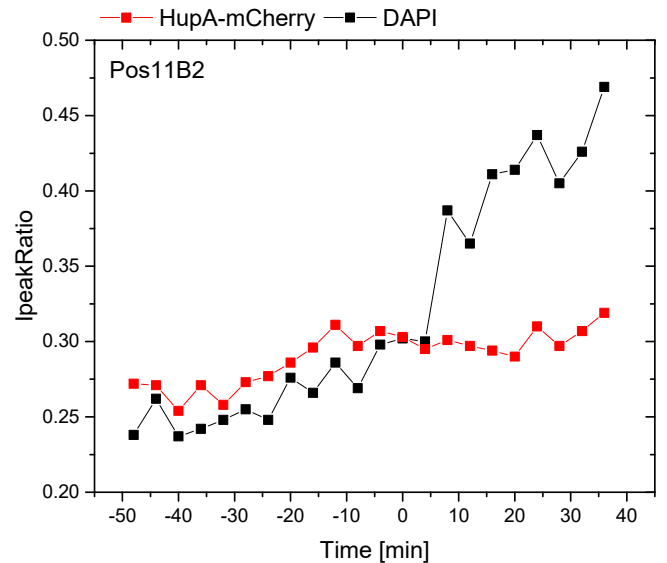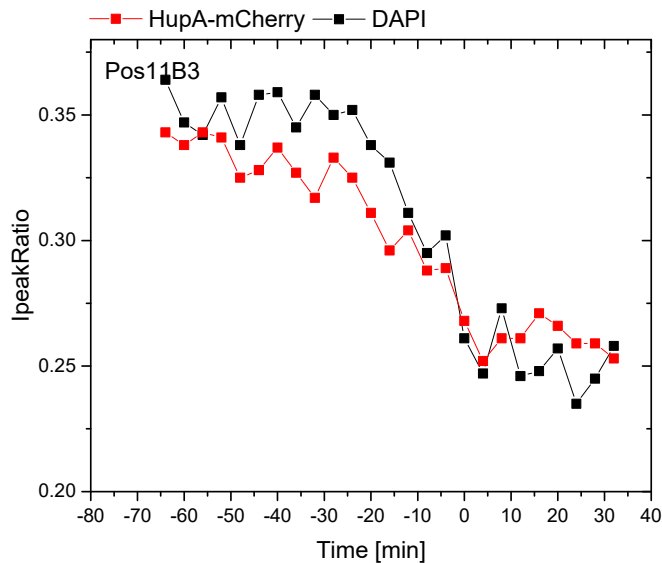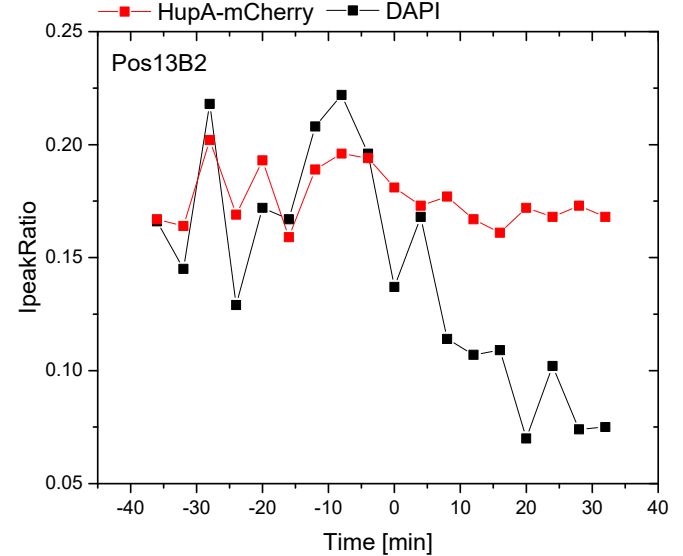

# Strain MB16

HupA-mCherry and DAPI  
fluorescence; ZipA-GFP induced

$I_{\text{peakRatio}} = (\text{Normalized Intensity}) / 100$   
0 min. corresponds to time when ZipA-GFP  
label dissociates from the septum

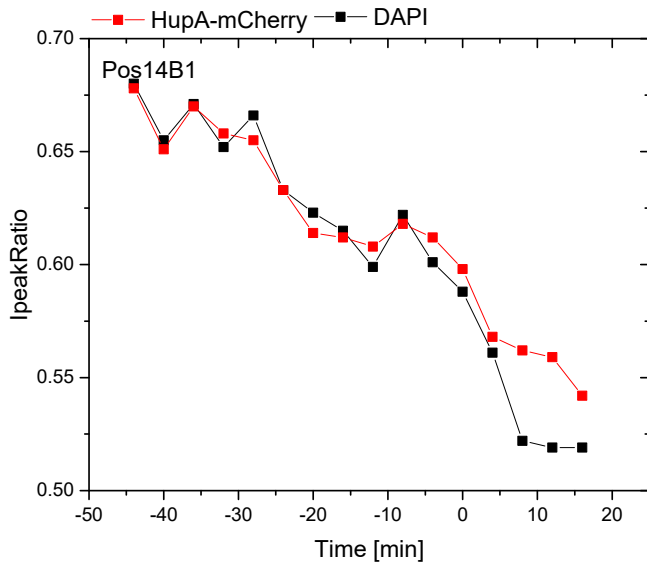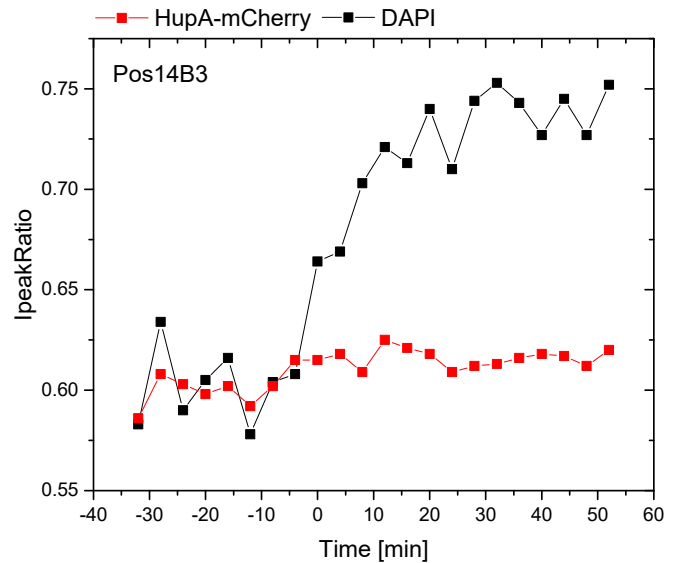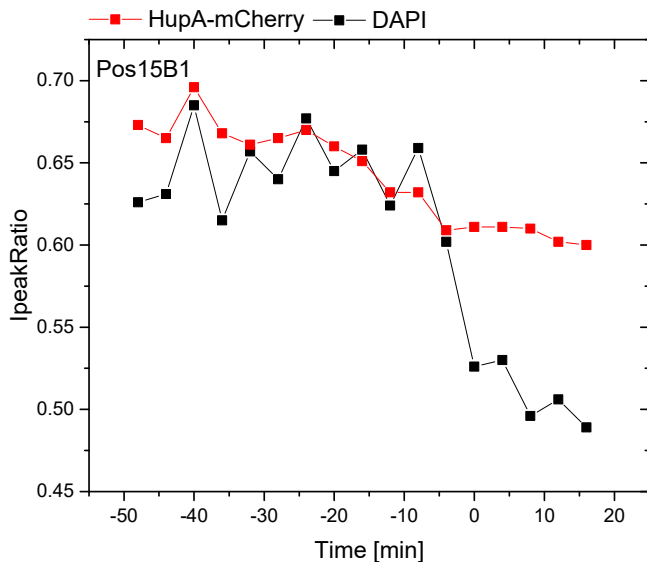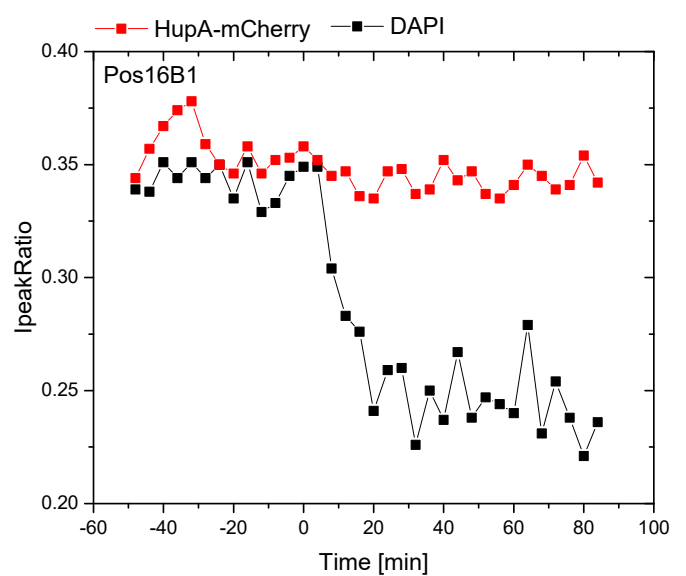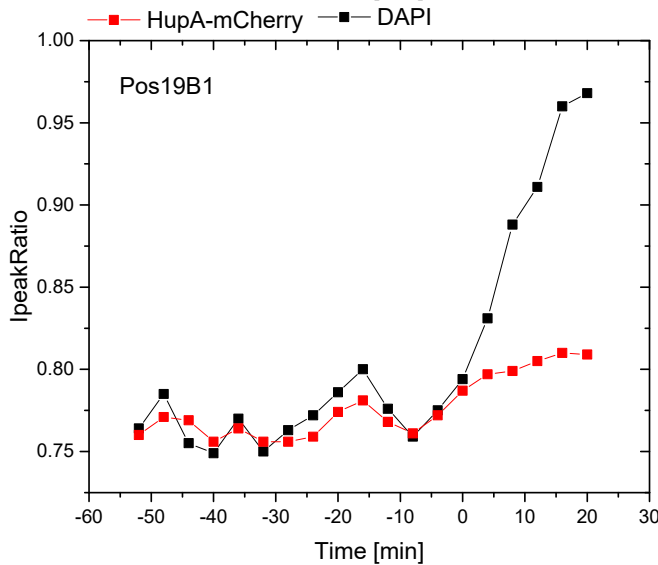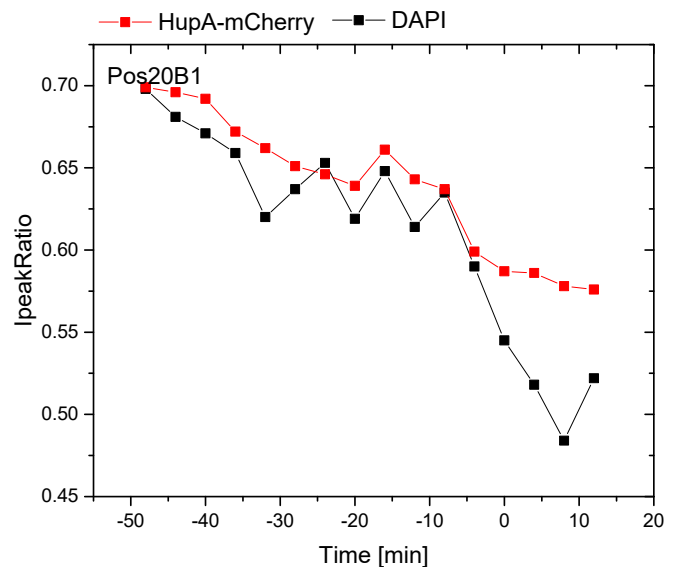

# Strain MB16

HupA-mCherry and DAPI  
fluorescence; ZipA-GFP induced

$I_{\text{peakRatio}} = (\text{Normalized Intensity}) / 100$

0 min. corresponds to time when ZipA-GFP label dissociates from the septum

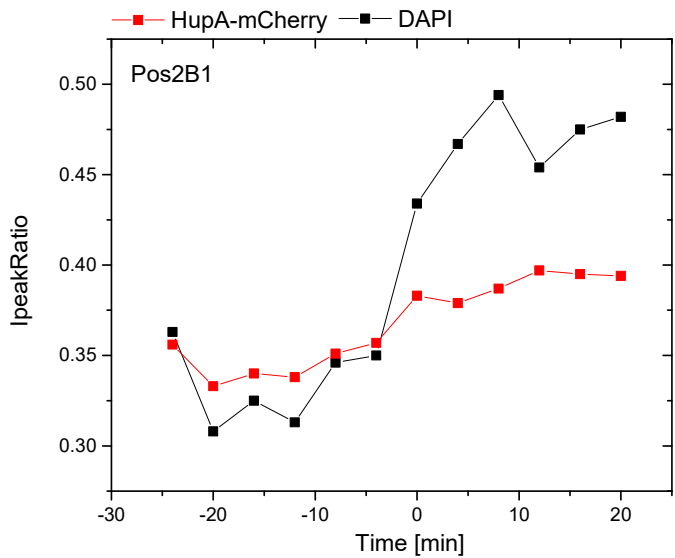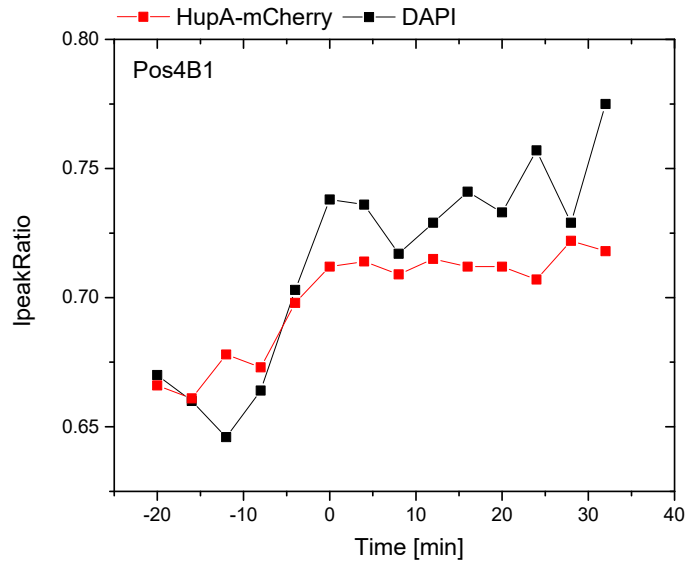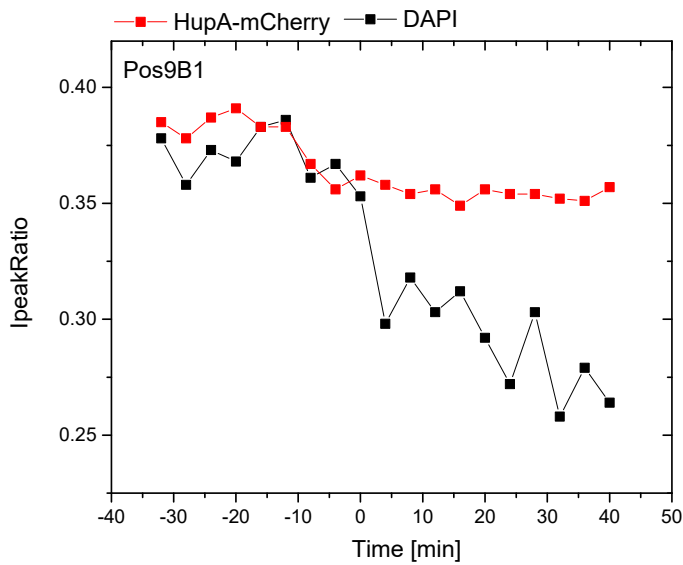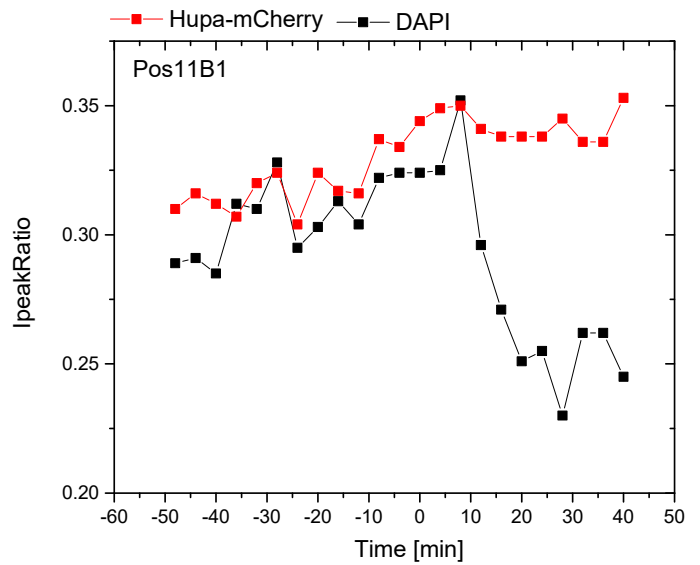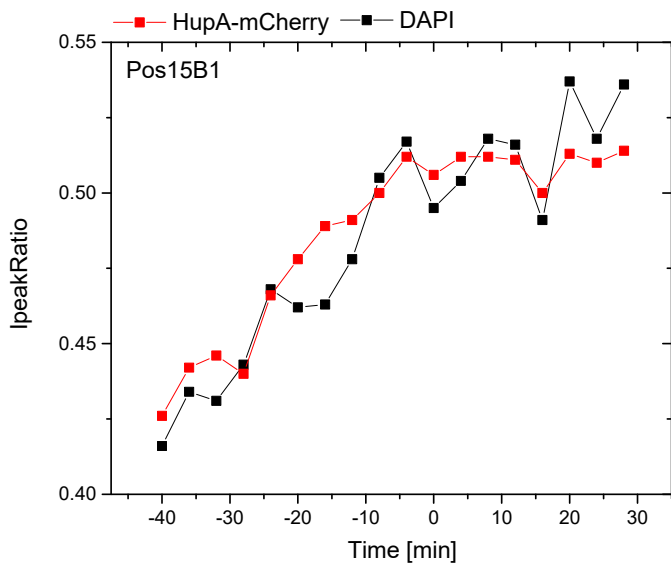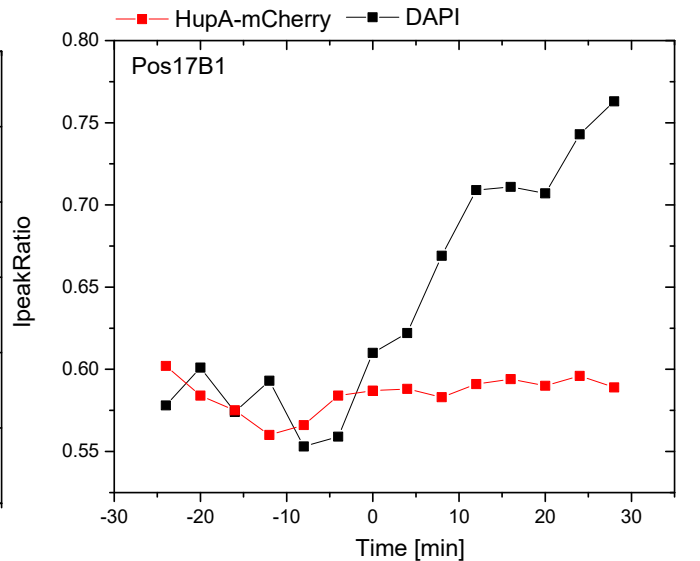

Supplement: pgen.1006638.s016.pdf [file pgen.1006638.s016.pdf]
